# Supplementary material for: Single-cell transcriptomics reveals multiple neuronal cell types in human midbrain-specific organoids
Source: PubMed Central journal article supplement (PMC7683480; doi:10.1007/s00441-020-03249-y), 2020-07-31

# Supplementary Figure 1

a. 35d DA dif

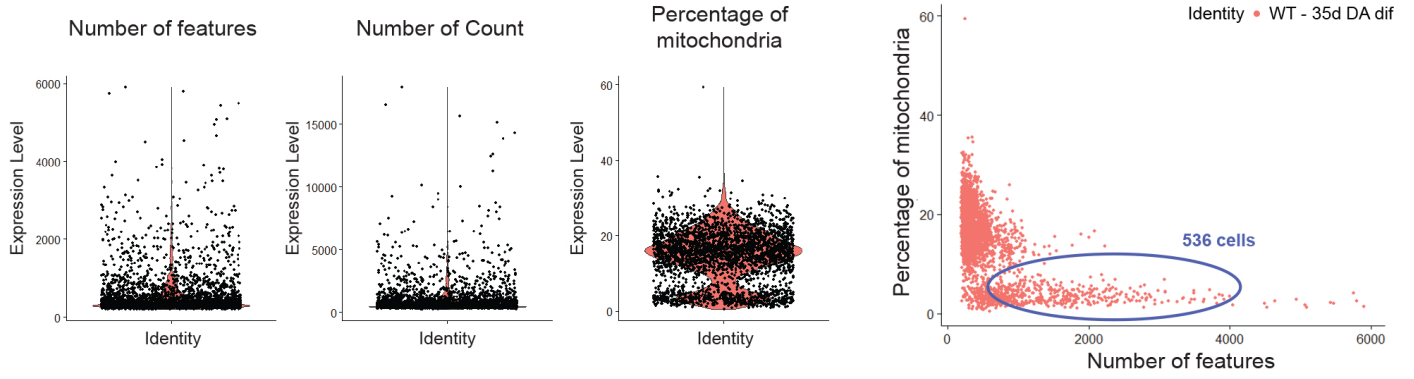

b. 70d DA dif

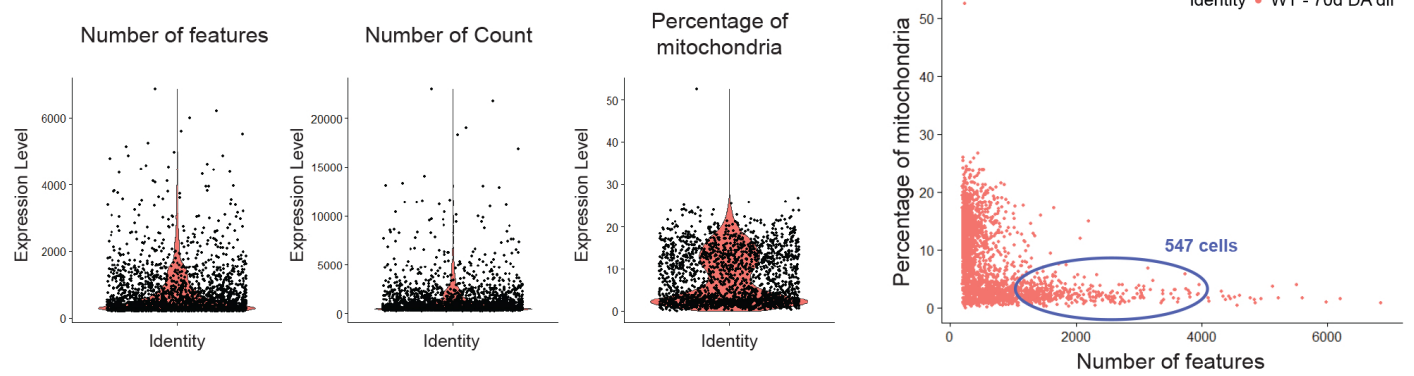

Supplement: 441_2020_3249_MOESM2_ESM.pdf [file 441_2020_3249_MOESM2_ESM.pdf]
